# Supplementary material
Source: PubMed Central journal article supplement (PMC7147570)
Supplement: NIHMS1563578-supplement-Supplemental_Figure_1.pdf [file NIHMS1563578-supplement-Supplemental_Figure_1.pdf]

## Molecular and cellular alterations induced by sustained expression of ciliary neurotrophic factor in a mouse model of retinitis pigmentosa

Kun Do Rhee<sup>a</sup>, Alberto Ruiz<sup>a</sup>, Jacque L. Duncan<sup>e</sup>, William W. Hauswirth<sup>f</sup>,  
Matthew M. LaVail<sup>e</sup>, Dean Bok<sup>abc\*</sup>, and Xian-Jie Yang<sup>abd\*</sup>

### Suppl. Figure 1

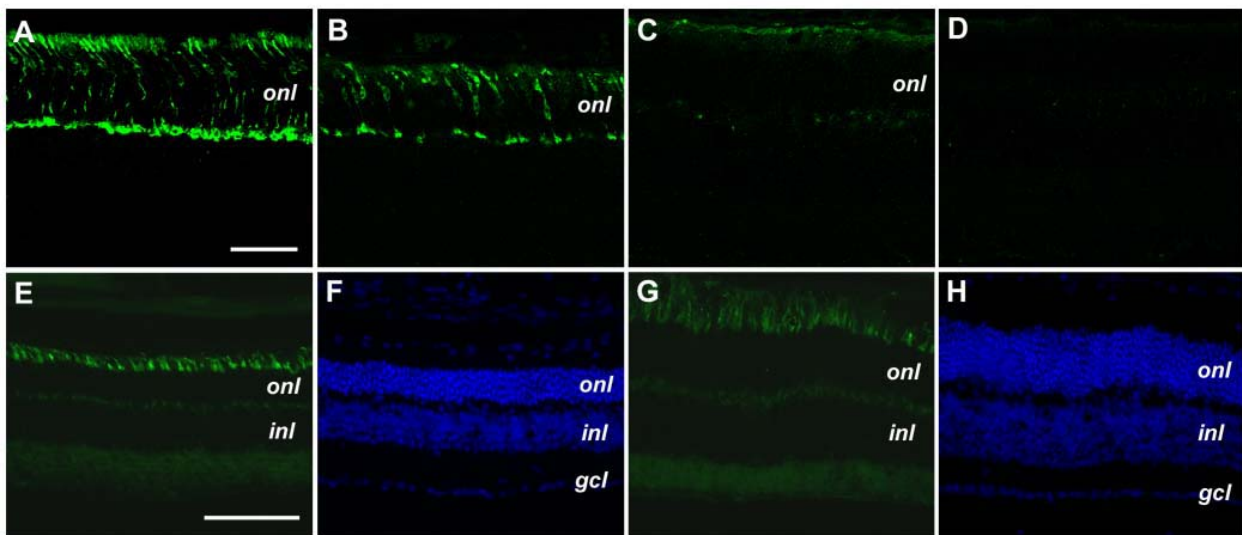

*Supplemental Figure 1. Effects of rAAV-CNTF on cone specific genes in the rds retina.*

Immunofluorescent images of adult wild-type (WT) retina (A), untreated P90 *rds* retina (B, D, E, F), and P90 *rds* retinas treated with rAAV-CNTF at P23 (C, G, H) labeled for mCAR (A-C), PNA (E, G) and DAPI (F, H) are shown. Panels F and H are corresponding sections of E and G, respectively. Panel D shows the signal level for secondary antibody alone. Scales bars in A and E represent 50  $\mu\text{m}$  and 100  $\mu\text{m}$  for A-D and E-H, respectively. *onl*, outer nuclear layer; *inl*, inner nuclear layer; *gcl*, ganglion cell layer.
